# Supplementary material
Source: publisher site journal article supplement (https://www.dovepress.com/get_supplementary_file.php?f=210672.docx)
Supplement: Supplementary file 1 [file get_supplementary_file.php]

**Supplementary Material (Tables)**

**Table S1**

**Table S1. Demographic data at baseline and after acupuncture modulation**

| Characteristics | Before acupuncture  (n=30) | After acupuncture  (n=30) | *p*-value |
| --- | --- | --- | --- |
| Sex (M/F) | 11/19 | 11/19 | - |
| Age (y) | 58.73±12.14 | - | - |
| Male patients | 62.64±14.19 |  | 0.185 |
| Female patients | 56.47±10.52 |  |  |
| Pain duration (mo.) | 25.67±23.67 | - | - |
| Side (right/left) | 14/16 | - |  |
| VAS | 6.09±1.73 | 3.97±2.21 | 0.000 ** |
| SBI | 13.33±5.12 | 10.10±4.84 | 0.008 * |
| RDQS | 10.60±4.64 | 7.77±5.23 | 0.004 * |
| WHOQOL-BREF, total | 53.97±8.27 | 54.75±7.55 | 0.483 |
| Physical | 12.72±2.18 | 13.58±2.11 | 0.036 * |
| Psychological | 13.29±2.49 | 13.39±2.22 | 0.740 |
| Social | 13.95±2.61 | 13.53±2.75 | 0.259 |
| Environmental | 14.00±2.61 | 14.23±1.88 | 0.385 |

The data are presented as the mean ± the standard deviation (SD). Data were compared using the χ2 test (for categorical variables) and independent t-test (for continuous variables). VAS, visual analog scale; SBI, Sciatica Bothersomeness Index; RDQS, Roland Disability Questionnaire for Sciatica. WHOQOL-BREF, the World Health Organization Quality of Life in the Brief Edition.

* *p*<0.05; ** *p*<0.01

**Table S2. Clinical characteristics at baseline and outcome in the different gender group**

| Characteristics | Male (n=11)  Before Acup | After Acup | *p*-value | Female (n=19)  Before Acup | After Acup | *p*-value | |
| --- | --- | --- | --- | --- | --- | --- | --- |
| Age (y) | 62.64±14.19 | - |  | 56.47±10.52 | - | 0.185 |
| BMI | 25.19±2.81 |  |  | 25.59±4.05 |  | 0.777 |
| Pain duration (mo.) | 22.00±22.90 |  |  | 27.79±24.46 |  | 0.528 |
| VAS | 5.82±1.40 | 3.72±2.70 | 0.011* | 6.26±1.92 | 4.12±1.94 | 0.002** |
| SBI | 11.36±4.97 | 7.73±3.47 | 0.061 | 14.47±4.98 | 11.47±5.06 | 0.036* |
| RDQS | 9.36±5.01 | 5.91±4.61 | 0.043* | 11.32±4.38 | 8.84±5.38 | 0.078 |
| WHOQOL-BREF, total | 52.86±8.26 | 53.40±9.48 | 0.722 | 54.61±8.15 | 55.53±6.33 | 1 |
| Physical | 12.62±2.36 | 13.40±2.51 | 0.236 | 12.78±2.13 | 13.68±1.91 | 0.156 |
| Psychological | 13.33±2.29 | 13.27±2.32 | 0.725 | 13.26±2.66 | 13.47±2.23 | 0.727 |
| Social | 13.46±2.82 | 13.09±3.31 | 0.399 | 14.25±2.52 | 13.79±2.41 | 0.273 |
| Environmental | 13.45±2.36 | 13.64±2.24 | 0.631 | 14.32±2.04 | 14.58±1.61 | 0.498 |

Data are presented as the mean ± the standard deviation (SD). The data were compared using the nonparametric Mann–Whitney test

(for continuous variables). Acup, acupuncture treatment; VAS, visual analog scale; SBI, Sciatica Bothersomeness Index; RDQS,

Roland Disability Questionnaire for Sciatica. WHOQOL-BREF, World Health Organization Quality of Life in the Brief Edition.

* *p*<0.05; ** *p*<0.01.
